# Supplementary material for: Expression of Polyamine Oxidase in Fibroblasts Induces MMP-1 and Decreases the Integrity of Extracellular Matrix
Source: MDPI journal article supplement (doi:10.3390/ijms231810487), 2022-09-10
Supplement: s1 [file s1]

*Supplementary materials*

# **Expression of Polyamine Oxidase in Fibroblasts Induces MMP-1 and Decreases the Integrity of Extracellular Matrix**

**Hae Dong Jeong <sup>1</sup>, Jin Hyung Kim <sup>1</sup>, Go Eun Kwon <sup>2</sup>, and Seung-Taek Lee <sup>1,\*</sup>**

<sup>1</sup> Department of Biochemistry, College of Life Science and Biotechnology,  
Yonsei University, Seoul 03722, Korea

<sup>2</sup> Molecular Recognition Research Center, Korea Institute of Science and Technology,  
Seoul 02792, Korea

\* Correspondence: stlee@yonsei.ac.kr; Tel.: +82221232703

**Table S1.** Primer sequences used for reverse transcription-polymerase chain reaction of *MMP-1*, *COL1A1*, *PAOX*, *SMOX*, *SSAT*, and *GAPDH* mRNAs.

| Gene Symbol      | Nucleotide Sequence              | Nucleotide Position | Annealing Temp. (°C) | GenBank #   |
|------------------|----------------------------------|---------------------|----------------------|-------------|
| <i>MMP1</i> -F   | 5'-GTACTGATATAATTTAGTTC-3'       | 1656–1675           | 45                   | NM_002421   |
| <i>MMP1</i> -R   | 5'-GTTATCCCTTGCCTATCTAG-3'       | 1908–1889           |                      |             |
| <i>COL1A1</i> -F | 5'-ACAGCGTCACTGTCGATGGCTG-3'     | 4341–4372           | 55                   | NM_000088   |
| <i>COL1A1</i> -R | 5'-GGAGGGAGTTTACAGGAAGCAGACAG-3' | 4522–4497           |                      |             |
| <i>PAOX</i> -F   | 5'-AAGAGCGTCCTGCGGTCTCG-3'       | 1313–1332           | 60                   | NM_152911.4 |
| <i>PAOX</i> -R   | 5'-CGTCCGTCGTGGAGTAAAACGT-3'     | 1501–1484           |                      |             |
| <i>SMOX</i> -F   | 5'-ATGCAGGTGCTGTTTTCCGGTGA-3'    | 1710–1732           | 65                   | NM_175839.3 |
| <i>SMOX</i> -R   | 5'-GGTACATCTCAATGAGGCGGGC-3'     | 1818–1797           |                      |             |
| <i>SSAT</i> -F   | 5'-GCAGCAGCATGCACTTCTTGGA-3'     | 544–566             | 60                   | NM_002970.4 |
| <i>SSAT</i> -R   | 5'-AGTCTCCAACCCTCTTCACTGGA-3'    | 646–624             |                      |             |
| <i>GAPDH</i> -F  | 5'-ACTGCTTAGCACCCCTGGCCA-3'      | 488–508             | 55                   | BC023632    |
| <i>GAPDH</i> -R  | 5'-TTGGCAGTGGGGACACGGAAG-3'      | 740–720             |                      |             |

F: forward primer and R: reverse primer
